# Supplementary material for: On the impact of model selection on predictor identification and parameter inference
Source: Springer Nature journal article supplement (doi:10.1007/s00180-016-0690-2), 2016-10-22
Supplement: 180_2016_690_MOESM1_ESM.pdf [file 180_2016_690_MOESM1_ESM.pdf]

**Supplemental tables for "On the impact of model selection on predictor identification and parameter inference", Computational Statistics**

Ruth M. Pfeiffer<sup>1</sup>, Andrew Redd<sup>2</sup>, Raymond Carroll<sup>3</sup>

<sup>1</sup> National Cancer Institute, Division of Cancer Epidemiology and Genetics, 9609 Medical Center Drive, Bethesda, MD 20892

<sup>2</sup> Department of Internal Medicine, University of Utah School of Medicine, Salt Lake City, UT, 84132

<sup>3</sup> Department of Statistics, Texas A&M University, College Station, TX 77843-3143.

Corresponding author: Ruth M. Pfeiffer  
National Cancer Institute  
9609 Medical Center Drive, Room 7E142  
Bethesda, MD 20892  
email: pfeiffer@mail.nih.gov  
Phone: (240) 276-7317

Table 1: Lars for linear regression

| $\Sigma_X$ | $n$ | $\beta^*$ | $FP$<br>rate | $FN$<br>rate | coverage of zero for  |                        |                  |          | coverage of 95% CIs                   |          |
|------------|-----|-----------|--------------|--------------|-----------------------|------------------------|------------------|----------|---------------------------------------|----------|
|            |     |           |              |              | $\beta = 0$           |                        | $\beta^* \neq 0$ |          | of $\beta^*$ for $\hat{\beta} \neq 0$ |          |
|            |     |           |              |              | (adapt <sup>1</sup> ) | (oracle <sup>2</sup> ) | (adapt)          | (oracle) | (adapt)                               | (oracle) |
| indep      | 100 | 0.25      | 0.220        | 0.232        | 0.997                 | 0.940                  | 0.830            | 0.449    | 0.715                                 | 0.729    |
| indep      | 200 | 0.25      | 0.319        | 0.016        | 0.996                 | 0.940                  | 0.384            | 0.100    | 0.814                                 | 0.916    |
| indep      | 500 | 0.25      | 0.344        | 0.000        | 0.995                 | 0.947                  | 0.007            | 0.001    | 0.829                                 | 0.939    |
| indep      | 100 | 0.5       | 0.285        | 0.002        | 0.996                 | 0.935                  | 0.136            | 0.014    | 0.806                                 | 0.895    |
| indep      | 200 | 0.5       | 0.322        | 0.000        | 0.996                 | 0.940                  | 0.000            | 0.000    | 0.825                                 | 0.920    |
| indep      | 500 | 0.5       | 0.348        | 0.000        | 0.994                 | 0.944                  | 0.000            | 0.000    | 0.822                                 | 0.941    |
| indep      | 100 | 1         | 0.254        | 0.000        | 0.997                 | 0.937                  | 0.000            | 0.000    | 0.778                                 | 0.891    |
| indep      | 200 | 1         | 0.337        | 0.000        | 0.996                 | 0.941                  | 0.000            | 0.000    | 0.809                                 | 0.925    |
| indep      | 500 | 1         | 0.451        | 0.000        | 0.990                 | 0.946                  | 0.000            | 0.000    | 0.833                                 | 0.940    |
| block      | 100 | 0.25      | 0.111        | 0.108        | 0.999                 | 0.963                  | 0.763            | 0.534    | 0.883                                 | 0.843    |
| block      | 200 | 0.25      | 0.148        | 0.013        | 0.999                 | 0.958                  | 0.399            | 0.244    | 0.934                                 | 0.935    |
| block      | 500 | 0.25      | 0.157        | 0.000        | 0.998                 | 0.959                  | 0.032            | 0.012    | 0.934                                 | 0.945    |
| block      | 100 | 0.5       | 0.106        | 0.003        | 0.999                 | 0.965                  | 0.198            | 0.063    | 0.927                                 | 0.922    |
| block      | 200 | 0.5       | 0.156        | 0.000        | 0.999                 | 0.957                  | 0.003            | 0.001    | 0.931                                 | 0.935    |
| block      | 500 | 0.5       | 0.147        | 0.000        | 0.999                 | 0.958                  | 0.000            | 0.000    | 0.931                                 | 0.943    |
| block      | 100 | 1         | 0.110        | 0.000        | 0.999                 | 0.966                  | 0.001            | 0.000    | 0.923                                 | 0.925    |
| block      | 200 | 1         | 0.157        | 0.000        | 0.998                 | 0.963                  | 0.000            | 0.000    | 0.918                                 | 0.940    |
| block      | 500 | 1         | 0.194        | 0.000        | 0.997                 | 0.969                  | 0.000            | 0.000    | 0.911                                 | 0.947    |
| AR         | 100 | 0.25      | 0.154        | 0.178        | 0.999                 | 0.957                  | 0.801            | 0.529    | 0.809                                 | 0.762    |
| AR         | 200 | 0.25      | 0.210        | 0.043        | 0.998                 | 0.951                  | 0.477            | 0.258    | 0.868                                 | 0.897    |
| AR         | 500 | 0.25      | 0.235        | 0.002        | 0.998                 | 0.954                  | 0.070            | 0.014    | 0.875                                 | 0.939    |
| AR         | 100 | 0.5       | 0.178        | 0.020        | 0.998                 | 0.955                  | 0.259            | 0.080    | 0.865                                 | 0.895    |
| AR         | 200 | 0.5       | 0.228        | 0.000        | 0.997                 | 0.950                  | 0.017            | 0.001    | 0.881                                 | 0.934    |
| AR         | 500 | 0.5       | 0.240        | 0.000        | 0.997                 | 0.949                  | 0.000            | 0.000    | 0.877                                 | 0.936    |
| AR         | 100 | 1         | 0.179        | 0.000        | 0.998                 | 0.954                  | 0.008            | 0.000    | 0.852                                 | 0.917    |
| AR         | 200 | 1         | 0.218        | 0.000        | 0.997                 | 0.953                  | 0.000            | 0.000    | 0.860                                 | 0.932    |
| AR         | 500 | 1         | 0.202        | 0.000        | 0.997                 | 0.959                  | 0.000            | 0.000    | 0.834                                 | 0.944    |

FP - false positive; FN - false negative

<sup>1</sup> corresponds to Algorithm 1, and <sup>2</sup> to Algorithm 2 in the text

$\Sigma_X$  is the covariance matrix of the predictors  $\mathbf{X}$

Table 2: LASSO for linear regression

| $\Sigma_X$ | $n$ | $\beta^*$ | $FP$<br>rate | $FN$<br>rate | coverage of zero for  |                        |                  |          | coverage of 95% CIs                   |          |
|------------|-----|-----------|--------------|--------------|-----------------------|------------------------|------------------|----------|---------------------------------------|----------|
|            |     |           |              |              | $\beta = 0$           |                        | $\beta^* \neq 0$ |          | of $\beta^*$ for $\hat{\beta} \neq 0$ |          |
|            |     |           |              |              | (adapt <sup>1</sup> ) | (oracle <sup>2</sup> ) | (adapt)          | (oracle) | (adapt)                               | (oracle) |
| indep      | 100 | 0.25      | 0.217        | 0.240        | 0.997                 | 0.943                  | 0.837            | 0.457    | 0.712                                 | 0.718    |
| indep      | 200 | 0.25      | 0.314        | 0.016        | 0.996                 | 0.942                  | 0.384            | 0.097    | 0.818                                 | 0.920    |
| indep      | 500 | 0.25      | 0.338        | 0.000        | 0.996                 | 0.946                  | 0.007            | 0.000    | 0.828                                 | 0.938    |
| indep      | 100 | 0.5       | 0.291        | 0.001        | 0.995                 | 0.934                  | 0.143            | 0.015    | 0.804                                 | 0.893    |
| indep      | 200 | 0.5       | 0.322        | 0.000        | 0.996                 | 0.940                  | 0.000            | 0.000    | 0.827                                 | 0.925    |
| indep      | 500 | 0.5       | 0.334        | 0.000        | 0.995                 | 0.945                  | 0.000            | 0.000    | 0.812                                 | 0.939    |
| indep      | 100 | 1         | 0.257        | 0.000        | 0.997                 | 0.939                  | 0.000            | 0.000    | 0.779                                 | 0.902    |
| indep      | 200 | 1         | 0.345        | 0.000        | 0.995                 | 0.942                  | 0.000            | 0.000    | 0.826                                 | 0.930    |
| indep      | 500 | 1         | 0.446        | 0.000        | 0.992                 | 0.946                  | 0.000            | 0.000    | 0.836                                 | 0.942    |
| block      | 100 | 0.25      | 0.120        | 0.107        | 0.999                 | 0.962                  | 0.758            | 0.534    | 0.884                                 | 0.847    |
| block      | 200 | 0.25      | 0.153        | 0.014        | 0.998                 | 0.959                  | 0.398            | 0.247    | 0.937                                 | 0.932    |
| block      | 500 | 0.25      | 0.152        | 0.000        | 0.999                 | 0.959                  | 0.032            | 0.011    | 0.933                                 | 0.947    |
| block      | 100 | 0.5       | 0.103        | 0.003        | 0.999                 | 0.966                  | 0.193            | 0.063    | 0.927                                 | 0.922    |
| block      | 200 | 0.5       | 0.157        | 0.000        | 0.999                 | 0.957                  | 0.006            | 0.002    | 0.936                                 | 0.933    |
| block      | 500 | 0.5       | 0.153        | 0.000        | 0.998                 | 0.958                  | 0.000            | 0.000    | 0.927                                 | 0.943    |
| block      | 100 | 1         | 0.103        | 0.000        | 0.999                 | 0.969                  | 0.002            | 0.000    | 0.923                                 | 0.929    |
| block      | 200 | 1         | 0.159        | 0.000        | 0.998                 | 0.963                  | 0.000            | 0.000    | 0.919                                 | 0.935    |
| block      | 500 | 1         | 0.199        | 0.000        | 0.997                 | 0.969                  | 0.000            | 0.000    | 0.913                                 | 0.945    |
| AR         | 100 | 0.25      | 0.160        | 0.184        | 0.998                 | 0.956                  | 0.795            | 0.527    | 0.805                                 | 0.762    |
| AR         | 200 | 0.25      | 0.212        | 0.044        | 0.998                 | 0.954                  | 0.471            | 0.253    | 0.875                                 | 0.896    |
| AR         | 500 | 0.25      | 0.241        | 0.001        | 0.998                 | 0.951                  | 0.061            | 0.011    | 0.883                                 | 0.944    |
| AR         | 100 | 0.5       | 0.182        | 0.020        | 0.998                 | 0.951                  | 0.255            | 0.082    | 0.860                                 | 0.889    |
| AR         | 200 | 0.5       | 0.238        | 0.000        | 0.997                 | 0.950                  | 0.020            | 0.001    | 0.883                                 | 0.931    |
| AR         | 500 | 0.5       | 0.239        | 0.000        | 0.998                 | 0.949                  | 0.000            | 0.000    | 0.878                                 | 0.941    |
| AR         | 100 | 1         | 0.171        | 0.000        | 0.998                 | 0.955                  | 0.007            | 0.000    | 0.845                                 | 0.909    |
| AR         | 200 | 1         | 0.208        | 0.000        | 0.997                 | 0.954                  | 0.000            | 0.000    | 0.854                                 | 0.928    |
| AR         | 500 | 1         | 0.189        | 0.000        | 0.997                 | 0.958                  | 0.000            | 0.000    | 0.830                                 | 0.944    |

FP - false positive; FN - false negative

<sup>1</sup> corresponds to Algorithm 1, and <sup>2</sup> to Algorithm 2 in the text

$\Sigma_X$  is the covariance matrix of the predictors  $\mathbf{X}$

Table 3: Elastic net for linear regression

| $\Sigma_X$ | $n$ | $\beta^*$ | $FP$<br>rate | $FN$<br>rate | coverage of zero for  |                        |                  |          | coverage of 95% CIs                   |          |
|------------|-----|-----------|--------------|--------------|-----------------------|------------------------|------------------|----------|---------------------------------------|----------|
|            |     |           |              |              | $\beta = 0$           |                        | $\beta^* \neq 0$ |          | of $\beta^*$ for $\hat{\beta} \neq 0$ |          |
|            |     |           |              |              | (adapt <sup>1</sup> ) | (oracle <sup>2</sup> ) | (adapt)          | (oracle) | (adapt)                               | (oracle) |
| indep      | 100 | 0.25      | 0.306        | 0.211        | 0.997                 | 0.953                  | 0.832            | 0.505    | 0.752                                 | 0.761    |
| indep      | 200 | 0.25      | 0.384        | 0.017        | 0.994                 | 0.948                  | 0.387            | 0.110    | 0.830                                 | 0.932    |
| indep      | 500 | 0.25      | 0.373        | 0.000        | 0.993                 | 0.951                  | 0.012            | 0.000    | 0.813                                 | 0.944    |
| indep      | 100 | 0.5       | 0.460        | 0.005        | 0.991                 | 0.957                  | 0.235            | 0.025    | 0.814                                 | 0.930    |
| indep      | 200 | 0.5       | 0.420        | 0.000        | 0.984                 | 0.952                  | 0.006            | 0.000    | 0.739                                 | 0.944    |
| indep      | 500 | 0.5       | 0.367        | 0.000        | 0.983                 | 0.956                  | 0.000            | 0.000    | 0.705                                 | 0.947    |
| indep      | 100 | 1         | 0.474        | 0.000        | 0.975                 | 0.966                  | 0.017            | 0.000    | 0.669                                 | 0.941    |
| indep      | 200 | 1         | 0.415        | 0.000        | 0.957                 | 0.967                  | 0.000            | 0.000    | 0.552                                 | 0.941    |
| indep      | 500 | 1         | 0.413        | 0.000        | 0.945                 | 0.968                  | 0.000            | 0.000    | 0.528                                 | 0.951    |
| block      | 100 | 0.25      | 0.044        | 0.014        | 1.000                 | 0.988                  | 0.623            | 0.562    | 0.982                                 | 0.939    |
| block      | 200 | 0.25      | 0.004        | 0.001        | 1.000                 | 0.998                  | 0.255            | 0.247    | 0.984                                 | 0.947    |
| block      | 500 | 0.25      | 0.000        | 0.000        | 1.000                 | 1.000                  | 0.002            | 0.010    | 0.985                                 | 0.950    |
| block      | 100 | 0.5       | 0.011        | 0.000        | 1.000                 | 0.997                  | 0.060            | 0.057    | 0.967                                 | 0.946    |
| block      | 200 | 0.5       | 0.000        | 0.000        | 1.000                 | 1.000                  | 0.001            | 0.001    | 0.954                                 | 0.951    |
| block      | 500 | 0.5       | 0.000        | 0.000        | 1.000                 | 1.000                  | 0.000            | 0.000    | 0.894                                 | 0.946    |
| block      | 100 | 1         | 0.001        | 0.000        | 1.000                 | 1.000                  | 0.002            | 0.000    | 0.854                                 | 0.951    |
| block      | 200 | 1         | 0.000        | 0.000        | 1.000                 | 1.000                  | 0.000            | 0.000    | 0.783                                 | 0.951    |
| block      | 500 | 1         | 0.000        | 0.000        | 1.000                 | 1.000                  | 0.000            | 0.000    | 0.789                                 | 0.950    |
| AR         | 100 | 0.25      | 0.175        | 0.093        | 1.000                 | 0.973                  | 0.743            | 0.583    | 0.902                                 | 0.857    |
| AR         | 200 | 0.25      | 0.111        | 0.052        | 1.000                 | 0.977                  | 0.348            | 0.273    | 0.882                                 | 0.895    |
| AR         | 500 | 0.25      | 0.036        | 0.010        | 1.000                 | 0.988                  | 0.159            | 0.021    | 0.798                                 | 0.935    |
| AR         | 100 | 0.5       | 0.129        | 0.031        | 0.999                 | 0.982                  | 0.212            | 0.093    | 0.855                                 | 0.908    |
| AR         | 200 | 0.5       | 0.057        | 0.013        | 0.999                 | 0.990                  | 0.126            | 0.014    | 0.770                                 | 0.922    |
| AR         | 500 | 0.5       | 0.019        | 0.001        | 0.998                 | 0.998                  | 0.026            | 0.001    | 0.661                                 | 0.948    |
| AR         | 100 | 1         | 0.107        | 0.017        | 0.996                 | 0.990                  | 0.100            | 0.017    | 0.752                                 | 0.915    |
| AR         | 200 | 1         | 0.034        | 0.005        | 0.997                 | 0.997                  | 0.034            | 0.005    | 0.619                                 | 0.934    |
| AR         | 500 | 1         | 0.012        | 0.000        | 0.998                 | 0.999                  | 0.009            | 0.000    | 0.483                                 | 0.948    |

FP - false positive; FN - false negative

<sup>1</sup> corresponds to Algorithm 1, and <sup>2</sup> to Algorithm 2 in the text

$\Sigma_X$  is the covariance matrix of the predictors  $\mathbf{X}$

Table 4: Relaxo for linear regression

| $\Sigma_X$ | $n$ | $\beta^*$ | $FP$<br>rate | $FN$<br>rate | coverage of zero for  |                        |                  |          | coverage of 95% CIs                   |          |
|------------|-----|-----------|--------------|--------------|-----------------------|------------------------|------------------|----------|---------------------------------------|----------|
|            |     |           |              |              | $\beta = 0$           |                        | $\beta^* \neq 0$ |          | of $\beta^*$ for $\hat{\beta} \neq 0$ |          |
|            |     |           |              |              | (adapt <sup>1</sup> ) | (oracle <sup>2</sup> ) | (adapt)          | (oracle) | (adapt)                               | (oracle) |
| indep      | 100 | 0.25      | 0.156        | 0.330        | 0.989                 | 0.953                  | 0.701            | 0.488    | 0.647                                 | 0.636    |
| indep      | 200 | 0.25      | 0.179        | 0.067        | 0.985                 | 0.950                  | 0.235            | 0.118    | 0.859                                 | 0.891    |
| indep      | 500 | 0.25      | 0.031        | 0.004        | 0.986                 | 0.981                  | 0.004            | 0.004    | 0.938                                 | 0.945    |
| indep      | 100 | 0.5       | 0.167        | 0.015        | 0.975                 | 0.953                  | 0.041            | 0.023    | 0.880                                 | 0.898    |
| indep      | 200 | 0.5       | 0.040        | 0.000        | 0.984                 | 0.980                  | 0.000            | 0.000    | 0.938                                 | 0.940    |
| indep      | 500 | 0.5       | 0.011        | 0.000        | 0.993                 | 0.992                  | 0.000            | 0.000    | 0.950                                 | 0.951    |
| indep      | 100 | 1         | 0.071        | 0.000        | 0.979                 | 0.975                  | 0.000            | 0.000    | 0.926                                 | 0.928    |
| indep      | 200 | 1         | 0.014        | 0.000        | 0.993                 | 0.992                  | 0.000            | 0.000    | 0.945                                 | 0.945    |
| indep      | 500 | 1         | 0.014        | 0.000        | 0.992                 | 0.991                  | 0.000            | 0.000    | 0.944                                 | 0.945    |
| block      | 100 | 0.25      | 0.048        | 0.184        | 0.992                 | 0.981                  | 0.565            | 0.512    | 0.775                                 | 0.762    |
| block      | 200 | 0.25      | 0.033        | 0.056        | 0.993                 | 0.986                  | 0.269            | 0.246    | 0.904                                 | 0.902    |
| block      | 500 | 0.25      | 0.019        | 0.003        | 0.994                 | 0.990                  | 0.013            | 0.013    | 0.946                                 | 0.947    |
| block      | 100 | 0.5       | 0.031        | 0.013        | 0.992                 | 0.987                  | 0.067            | 0.063    | 0.932                                 | 0.930    |
| block      | 200 | 0.5       | 0.020        | 0.001        | 0.994                 | 0.990                  | 0.001            | 0.001    | 0.945                                 | 0.944    |
| block      | 500 | 0.5       | 0.019        | 0.000        | 0.994                 | 0.990                  | 0.000            | 0.000    | 0.952                                 | 0.952    |
| block      | 100 | 1         | 0.022        | 0.000        | 0.994                 | 0.990                  | 0.000            | 0.000    | 0.946                                 | 0.945    |
| block      | 200 | 1         | 0.020        | 0.000        | 0.994                 | 0.990                  | 0.000            | 0.000    | 0.944                                 | 0.943    |
| block      | 500 | 1         | 0.020        | 0.000        | 0.994                 | 0.990                  | 0.000            | 0.000    | 0.948                                 | 0.948    |
| AR         | 100 | 0.25      | 0.094        | 0.298        | 0.990                 | 0.970                  | 0.632            | 0.554    | 0.659                                 | 0.634    |
| AR         | 200 | 0.25      | 0.081        | 0.142        | 0.991                 | 0.973                  | 0.346            | 0.296    | 0.805                                 | 0.798    |
| AR         | 500 | 0.25      | 0.061        | 0.033        | 0.988                 | 0.976                  | 0.043            | 0.040    | 0.908                                 | 0.910    |
| AR         | 100 | 0.5       | 0.092        | 0.065        | 0.987                 | 0.972                  | 0.131            | 0.113    | 0.852                                 | 0.850    |
| AR         | 200 | 0.5       | 0.051        | 0.009        | 0.988                 | 0.979                  | 0.010            | 0.009    | 0.920                                 | 0.928    |
| AR         | 500 | 0.5       | 0.018        | 0.000        | 0.993                 | 0.990                  | 0.000            | 0.000    | 0.948                                 | 0.949    |
| AR         | 100 | 1         | 0.055        | 0.001        | 0.985                 | 0.980                  | 0.001            | 0.001    | 0.927                                 | 0.930    |
| AR         | 200 | 1         | 0.018        | 0.000        | 0.993                 | 0.991                  | 0.000            | 0.000    | 0.943                                 | 0.944    |
| AR         | 500 | 1         | 0.019        | 0.000        | 0.993                 | 0.990                  | 0.000            | 0.000    | 0.945                                 | 0.947    |

FP - false positive; FN - false negative

<sup>1</sup> corresponds to Algorithm 1, and <sup>2</sup> to Algorithm 2 in the text

$\Sigma_X$  is the covariance matrix of the predictors  $\mathbf{X}$

Table 5: SCAD for linear regression

| $\Sigma_X$ | $n$ | $\beta^*$ | $FP$<br>rate | $FN$<br>rate | coverage of zero for  |                        |                  |          | coverage of 95% CIs                   |          |
|------------|-----|-----------|--------------|--------------|-----------------------|------------------------|------------------|----------|---------------------------------------|----------|
|            |     |           |              |              | $\beta = 0$           |                        | $\beta^* \neq 0$ |          | of $\beta^*$ for $\hat{\beta} \neq 0$ |          |
|            |     |           |              |              | (adapt <sup>1</sup> ) | (oracle <sup>2</sup> ) | (adapt)          | (oracle) | (adapt)                               | (oracle) |
| indep      | 100 | 0.25      | 0.183        | 0.309        | 0.995                 | 0.943                  | 0.809            | 0.479    | 0.636                                 | 0.645    |
| indep      | 200 | 0.25      | 0.243        | 0.020        | 0.995                 | 0.943                  | 0.423            | 0.092    | 0.775                                 | 0.927    |
| indep      | 500 | 0.25      | 0.529        | 0.000        | 0.988                 | 0.945                  | 0.007            | 0.000    | 0.890                                 | 0.944    |
| indep      | 100 | 0.5       | 0.276        | 0.003        | 0.993                 | 0.927                  | 0.094            | 0.016    | 0.824                                 | 0.876    |
| indep      | 200 | 0.5       | 0.209        | 0.000        | 0.997                 | 0.945                  | 0.000            | 0.000    | 0.861                                 | 0.918    |
| indep      | 500 | 0.5       | 0.153        | 0.000        | 0.995                 | 0.953                  | 0.000            | 0.000    | 0.835                                 | 0.941    |
| indep      | 100 | 1         | 0.147        | 0.000        | 0.996                 | 0.946                  | 0.000            | 0.000    | 0.898                                 | 0.900    |
| indep      | 200 | 1         | 0.149        | 0.000        | 0.999                 | 0.952                  | 0.000            | 0.000    | 0.933                                 | 0.933    |
| indep      | 500 | 1         | 0.054        | 0.000        | 0.999                 | 0.956                  | 0.000            | 0.000    | 0.948                                 | 0.946    |
| block      | 100 | 0.25      | 0.100        | 0.144        | 0.996                 | 0.961                  | 0.714            | 0.519    | 0.817                                 | 0.802    |
| block      | 200 | 0.25      | 0.157        | 0.021        | 0.999                 | 0.960                  | 0.402            | 0.246    | 0.885                                 | 0.928    |
| block      | 500 | 0.25      | 0.144        | 0.000        | 0.995                 | 0.960                  | 0.055            | 0.011    | 0.873                                 | 0.947    |
| block      | 100 | 0.5       | 0.123        | 0.013        | 0.995                 | 0.956                  | 0.225            | 0.072    | 0.799                                 | 0.900    |
| block      | 200 | 0.5       | 0.171        | 0.000        | 0.996                 | 0.958                  | 0.012            | 0.002    | 0.857                                 | 0.933    |
| block      | 500 | 0.5       | 0.117        | 0.000        | 0.997                 | 0.964                  | 0.000            | 0.000    | 0.875                                 | 0.949    |
| block      | 100 | 1         | 0.163        | 0.000        | 0.994                 | 0.945                  | 0.001            | 0.000    | 0.880                                 | 0.906    |
| block      | 200 | 1         | 0.143        | 0.000        | 0.998                 | 0.960                  | 0.000            | 0.000    | 0.942                                 | 0.933    |
| block      | 500 | 1         | 0.045        | 0.000        | 1.000                 | 0.971                  | 0.000            | 0.000    | 0.947                                 | 0.945    |
| AR         | 100 | 0.25      | 0.129        | 0.233        | 0.995                 | 0.955                  | 0.770            | 0.528    | 0.734                                 | 0.695    |
| AR         | 200 | 0.25      | 0.177        | 0.051        | 0.997                 | 0.958                  | 0.476            | 0.248    | 0.824                                 | 0.895    |
| AR         | 500 | 0.25      | 0.334        | 0.007        | 0.992                 | 0.947                  | 0.081            | 0.017    | 0.842                                 | 0.935    |
| AR         | 100 | 0.5       | 0.168        | 0.032        | 0.993                 | 0.948                  | 0.259            | 0.085    | 0.760                                 | 0.864    |
| AR         | 200 | 0.5       | 0.190        | 0.000        | 0.996                 | 0.953                  | 0.018            | 0.001    | 0.833                                 | 0.920    |
| AR         | 500 | 0.5       | 0.177        | 0.000        | 0.996                 | 0.959                  | 0.000            | 0.000    | 0.859                                 | 0.945    |
| AR         | 100 | 1         | 0.167        | 0.000        | 0.994                 | 0.946                  | 0.001            | 0.000    | 0.879                                 | 0.906    |
| AR         | 200 | 1         | 0.152        | 0.000        | 0.999                 | 0.958                  | 0.000            | 0.000    | 0.937                                 | 0.929    |
| AR         | 500 | 1         | 0.049        | 0.000        | 1.000                 | 0.967                  | 0.000            | 0.000    | 0.954                                 | 0.948    |

FP - false positive; FN - false negative

<sup>1</sup> corresponds to Algorithm 1, and <sup>2</sup> to Algorithm 2 in the text

$\Sigma_X$  is the covariance matrix of the predictors  $\mathbf{X}$

Table 6: Penalized linear regression

| $\Sigma_X$ | $n$ | $\beta^*$ | $FP$<br>rate | $FN$<br>rate | coverage of zero for  |                        |                  |          | coverage of 95% CIs                   |          |
|------------|-----|-----------|--------------|--------------|-----------------------|------------------------|------------------|----------|---------------------------------------|----------|
|            |     |           |              |              | $\beta = 0$           |                        | $\beta^* \neq 0$ |          | of $\beta^*$ for $\hat{\beta} \neq 0$ |          |
|            |     |           |              |              | (adapt <sup>1</sup> ) | (oracle <sup>2</sup> ) | (adapt)          | (oracle) | (adapt)                               | (oracle) |
| indep      | 100 | 0.25      | 0.326        | 0.162        | 0.999                 | 0.946                  | 0.930            | 0.467    | 0.803                                 | 0.797    |
| indep      | 200 | 0.25      | 0.422        | 0.010        | 0.996                 | 0.939                  | 0.440            | 0.109    | 0.837                                 | 0.924    |
| indep      | 500 | 0.25      | 0.485        | 0.000        | 0.991                 | 0.945                  | 0.005            | 0.000    | 0.873                                 | 0.942    |
| indep      | 100 | 0.5       | 0.285        | 0.002        | 0.998                 | 0.940                  | 0.213            | 0.017    | 0.787                                 | 0.901    |
| indep      | 200 | 0.5       | 0.351        | 0.000        | 0.995                 | 0.939                  | 0.000            | 0.000    | 0.824                                 | 0.926    |
| indep      | 500 | 0.5       | 0.434        | 0.000        | 0.992                 | 0.945                  | 0.000            | 0.000    | 0.861                                 | 0.941    |
| indep      | 100 | 1         | 0.247        | 0.000        | 0.998                 | 0.944                  | 0.000            | 0.000    | 0.792                                 | 0.902    |
| indep      | 200 | 1         | 0.327        | 0.000        | 0.996                 | 0.944                  | 0.000            | 0.000    | 0.828                                 | 0.929    |
| indep      | 500 | 1         | 0.432        | 0.000        | 0.992                 | 0.944                  | 0.000            | 0.000    | 0.866                                 | 0.941    |
| block      | 100 | 0.25      | 0.253        | 0.044        | 0.999                 | 0.960                  | 0.832            | 0.557    | 0.950                                 | 0.904    |
| block      | 200 | 0.25      | 0.280        | 0.006        | 0.999                 | 0.952                  | 0.390            | 0.260    | 0.968                                 | 0.936    |
| block      | 500 | 0.25      | 0.342        | 0.000        | 0.997                 | 0.944                  | 0.016            | 0.013    | 0.961                                 | 0.947    |
| block      | 100 | 0.5       | 0.179        | 0.001        | 0.999                 | 0.961                  | 0.142            | 0.073    | 0.956                                 | 0.920    |
| block      | 200 | 0.5       | 0.228        | 0.000        | 0.998                 | 0.955                  | 0.002            | 0.001    | 0.950                                 | 0.933    |
| block      | 500 | 0.5       | 0.299        | 0.000        | 0.998                 | 0.945                  | 0.000            | 0.000    | 0.949                                 | 0.947    |
| block      | 100 | 1         | 0.136        | 0.000        | 0.999                 | 0.966                  | 0.000            | 0.000    | 0.938                                 | 0.917    |
| block      | 200 | 1         | 0.196        | 0.000        | 0.998                 | 0.956                  | 0.000            | 0.000    | 0.936                                 | 0.935    |
| block      | 500 | 1         | 0.286        | 0.000        | 0.997                 | 0.946                  | 0.000            | 0.000    | 0.940                                 | 0.941    |
| AR         | 100 | 0.25      | 0.284        | 0.109        | 0.999                 | 0.957                  | 0.882            | 0.570    | 0.885                                 | 0.840    |
| AR         | 200 | 0.25      | 0.353        | 0.020        | 0.999                 | 0.947                  | 0.500            | 0.263    | 0.929                                 | 0.923    |
| AR         | 500 | 0.25      | 0.396        | 0.000        | 0.996                 | 0.948                  | 0.037            | 0.011    | 0.919                                 | 0.943    |
| AR         | 100 | 0.5       | 0.224        | 0.012        | 0.999                 | 0.956                  | 0.249            | 0.079    | 0.892                                 | 0.905    |
| AR         | 200 | 0.5       | 0.291        | 0.000        | 0.998                 | 0.950                  | 0.010            | 0.001    | 0.900                                 | 0.934    |
| AR         | 500 | 0.5       | 0.364        | 0.000        | 0.996                 | 0.948                  | 0.000            | 0.000    | 0.912                                 | 0.948    |
| AR         | 100 | 1         | 0.189        | 0.000        | 0.998                 | 0.958                  | 0.001            | 0.000    | 0.867                                 | 0.912    |
| AR         | 200 | 1         | 0.261        | 0.000        | 0.997                 | 0.950                  | 0.000            | 0.000    | 0.886                                 | 0.928    |
| AR         | 500 | 1         | 0.341        | 0.000        | 0.996                 | 0.947                  | 0.000            | 0.000    | 0.904                                 | 0.940    |

FP - false positive; FN - false negative

<sup>1</sup> corresponds to Algorithm 1, and <sup>2</sup> to Algorithm 2 in the text

$\Sigma_X$  is the covariance matrix of the predictors  $\mathbf{X}$

Table 7: Penalized partial least squares linear regression

| $\Sigma_X$ | $n$ | $\beta^*$ | $FP$<br>rate | $FN$<br>rate | coverage of zero for  |                        |           |          | coverage of 95% CIs<br>of $\beta^*$ for $\hat{\beta} \neq 0$ |          |
|------------|-----|-----------|--------------|--------------|-----------------------|------------------------|-----------|----------|--------------------------------------------------------------|----------|
|            |     |           |              |              | $\beta = 0$           |                        | $\beta^*$ |          | (adapt)                                                      | (oracle) |
|            |     |           |              |              | (adapt <sup>1</sup> ) | (oracle <sup>2</sup> ) | (adapt)   | (oracle) | (adapt)                                                      | (oracle) |
| indep      | 100 | 0.25      | 0.001        | 0.876        | 0.999                 | 0.999                  | 0.887     | 0.887    | 0.111                                                        | 0.111    |
| indep      | 200 | 0.25      | 0.000        | 0.861        | 1.000                 | 1.000                  | 0.862     | 0.862    | 0.127                                                        | 0.127    |
| indep      | 500 | 0.25      | 0.005        | 0.812        | 0.999                 | 0.999                  | 0.812     | 0.812    | 0.174                                                        | 0.174    |
| indep      | 100 | 0.5       | 0.000        | 0.748        | 1.000                 | 1.000                  | 0.752     | 0.752    | 0.232                                                        | 0.232    |
| indep      | 200 | 0.5       | 0.002        | 0.707        | 1.000                 | 1.000                  | 0.707     | 0.707    | 0.276                                                        | 0.276    |
| indep      | 500 | 0.5       | 0.062        | 0.544        | 0.995                 | 0.995                  | 0.544     | 0.544    | 0.433                                                        | 0.433    |
| indep      | 100 | 1         | 0.004        | 0.463        | 0.998                 | 0.998                  | 0.464     | 0.464    | 0.507                                                        | 0.507    |
| indep      | 200 | 1         | 0.017        | 0.372        | 0.997                 | 0.997                  | 0.372     | 0.372    | 0.594                                                        | 0.594    |
| indep      | 500 | 1         | 0.153        | 0.306        | 0.990                 | 0.990                  | 0.306     | 0.306    | 0.657                                                        | 0.657    |
| block      | 100 | 0.25      | 0.001        | 0.784        | 0.999                 | 0.999                  | 0.784     | 0.784    | 0.022                                                        | 0.022    |
| block      | 200 | 0.25      | 0.000        | 0.791        | 1.000                 | 1.000                  | 0.791     | 0.791    | 0.006                                                        | 0.006    |
| block      | 500 | 0.25      | 0.000        | 0.804        | 1.000                 | 1.000                  | 0.804     | 0.804    | 0.000                                                        | 0.000    |
| block      | 100 | 0.5       | 0.000        | 0.713        | 1.000                 | 1.000                  | 0.713     | 0.713    | 0.037                                                        | 0.037    |
| block      | 200 | 0.5       | 0.000        | 0.759        | 1.000                 | 1.000                  | 0.759     | 0.759    | 0.002                                                        | 0.002    |
| block      | 500 | 0.5       | 0.000        | 0.794        | 1.000                 | 1.000                  | 0.794     | 0.794    | 0.000                                                        | 0.000    |
| block      | 100 | 1         | 0.003        | 0.589        | 0.999                 | 0.999                  | 0.589     | 0.589    | 0.088                                                        | 0.088    |
| block      | 200 | 1         | 0.001        | 0.651        | 1.000                 | 1.000                  | 0.651     | 0.651    | 0.021                                                        | 0.021    |
| block      | 500 | 1         | 0.001        | 0.693        | 1.000                 | 1.000                  | 0.693     | 0.693    | 0.013                                                        | 0.013    |
| AR         | 100 | 0.25      | 0.002        | 0.789        | 0.999                 | 0.999                  | 0.790     | 0.790    | 0.051                                                        | 0.051    |
| AR         | 200 | 0.25      | 0.001        | 0.773        | 1.000                 | 1.000                  | 0.773     | 0.773    | 0.030                                                        | 0.030    |
| AR         | 500 | 0.25      | 0.001        | 0.763        | 1.000                 | 1.000                  | 0.763     | 0.763    | 0.019                                                        | 0.019    |
| AR         | 100 | 0.5       | 0.003        | 0.665        | 0.998                 | 0.998                  | 0.666     | 0.666    | 0.117                                                        | 0.117    |
| AR         | 200 | 0.5       | 0.005        | 0.649        | 0.998                 | 0.998                  | 0.649     | 0.649    | 0.099                                                        | 0.099    |
| AR         | 500 | 0.5       | 0.024        | 0.443        | 0.992                 | 0.992                  | 0.443     | 0.443    | 0.305                                                        | 0.305    |
| AR         | 100 | 1         | 0.022        | 0.422        | 0.990                 | 0.990                  | 0.422     | 0.422    | 0.333                                                        | 0.333    |
| AR         | 200 | 1         | 0.041        | 0.288        | 0.986                 | 0.986                  | 0.288     | 0.288    | 0.473                                                        | 0.473    |
| AR         | 500 | 1         | 0.076        | 0.153        | 0.982                 | 0.982                  | 0.153     | 0.153    | 0.642                                                        | 0.642    |

FP - false positive; FN - false negative

<sup>1</sup> corresponds to Algorithm 1, and <sup>2</sup> to Algorithm 2 in the text

$\Sigma_X$  is the covariance matrix of the predictors  $\mathbf{X}$

Table 8: Performance of the various methods when the error distribution in the linear model was a  $t$ -distribution with 15 degrees of freedom for  $\Sigma_X$  set of the identity matrix

| Algorithm     | $n$ | $\beta^*$ | $FP$<br>rate | $FN$<br>rate | coverage of zero for  |                        |                  |          | coverage of 95% CIs                   |          |
|---------------|-----|-----------|--------------|--------------|-----------------------|------------------------|------------------|----------|---------------------------------------|----------|
|               |     |           |              |              | $\beta = 0$           |                        | $\beta^* \neq 0$ |          | of $\beta^*$ for $\hat{\beta} \neq 0$ |          |
|               |     |           |              |              | (adapt <sup>1</sup> ) | (oracle <sup>2</sup> ) | (adapt)          | (oracle) | (adapt)                               | (oracle) |
| lars          | 100 | 0.25      | 0.19         | 0.31         | 1.00                  | 0.95                   | 0.88             | 0.52     | 0.65                                  | 0.65     |
| lars          | 100 | 0.5       | 0.29         | 0.00         | 1.00                  | 0.93                   | 0.20             | 0.03     | 0.80                                  | 0.89     |
| lars          | 200 | 0.25      | 0.30         | 0.03         | 1.00                  | 0.94                   | 0.47             | 0.14     | 0.82                                  | 0.92     |
| lars          | 200 | 0.5       | 0.32         | 0.00         | 1.00                  | 0.94                   | 0.00             | 0.00     | 0.83                                  | 0.93     |
| lars          | 500 | 0.25      | 0.34         | 0.00         | 1.00                  | 0.95                   | 0.02             | 0.00     | 0.83                                  | 0.94     |
| lars          | 500 | 0.5       | 0.32         | 0.00         | 1.00                  | 0.94                   | 0.00             | 0.00     | 0.82                                  | 0.94     |
| LASSO         | 100 | 0.25      | 0.19         | 0.31         | 1.00                  | 0.94                   | 0.87             | 0.52     | 0.65                                  | 0.65     |
| LASSO         | 100 | 0.5       | 0.29         | 0.00         | 1.00                  | 0.93                   | 0.20             | 0.03     | 0.80                                  | 0.89     |
| LASSO         | 200 | 0.25      | 0.31         | 0.03         | 1.00                  | 0.94                   | 0.47             | 0.14     | 0.83                                  | 0.92     |
| LASSO         | 200 | 0.5       | 0.32         | 0.00         | 1.00                  | 0.94                   | 0.00             | 0.00     | 0.83                                  | 0.93     |
| LASSO         | 500 | 0.25      | 0.33         | 0.00         | 1.00                  | 0.95                   | 0.02             | 0.00     | 0.83                                  | 0.94     |
| LASSO         | 500 | 0.5       | 0.33         | 0.00         | 1.00                  | 0.94                   | 0.00             | 0.00     | 0.83                                  | 0.94     |
| elastic net   | 100 | 0.25      | 0.28         | 0.27         | 1.00                  | 0.95                   | 0.87             | 0.56     | 0.71                                  | 0.70     |
| elastic net   | 100 | 0.5       | 0.45         | 0.01         | 0.99                  | 0.95                   | 0.28             | 0.05     | 0.82                                  | 0.92     |
| elastic net   | 200 | 0.25      | 0.37         | 0.03         | 0.99                  | 0.95                   | 0.47             | 0.15     | 0.83                                  | 0.93     |
| elastic net   | 200 | 0.5       | 0.43         | 0.00         | 0.99                  | 0.95                   | 0.01             | 0.00     | 0.76                                  | 0.94     |
| elastic net   | 500 | 0.25      | 0.37         | 0.00         | 0.99                  | 0.95                   | 0.02             | 0.00     | 0.82                                  | 0.95     |
| elastic net   | 500 | 0.5       | 0.37         | 0.00         | 0.99                  | 0.95                   | 0.00             | 0.00     | 0.72                                  | 0.94     |
| relaxo        | 100 | 0.25      | 0.15         | 0.40         | 0.99                  | 0.95                   | 0.76             | 0.56     | 0.58                                  | 0.56     |
| relaxo        | 100 | 0.5       | 0.19         | 0.02         | 0.98                  | 0.95                   | 0.07             | 0.04     | 0.87                                  | 0.90     |
| relaxo        | 200 | 0.25      | 0.18         | 0.09         | 0.99                  | 0.95                   | 0.32             | 0.16     | 0.85                                  | 0.87     |
| relaxo        | 200 | 0.5       | 0.05         | 0.00         | 0.98                  | 0.98                   | 0.00             | 0.00     | 0.94                                  | 0.94     |
| relaxo        | 500 | 0.25      | 0.05         | 0.01         | 0.98                  | 0.98                   | 0.01             | 0.01     | 0.94                                  | 0.95     |
| relaxo        | 500 | 0.5       | 0.01         | 0.00         | 0.99                  | 0.99                   | 0.00             | 0.00     | 0.95                                  | 0.95     |
| penalized.pls | 100 | 0.25      | 0.00         | 0.88         | 1.00                  | 1.00                   | 0.89             | 0.89     | 0.10                                  | 0.10     |
| penalized.pls | 100 | 0.5       | 0.00         | 0.76         | 1.00                  | 1.00                   | 0.77             | 0.77     | 0.22                                  | 0.22     |
| penalized.pls | 200 | 0.25      | 0.00         | 0.87         | 1.00                  | 1.00                   | 0.87             | 0.87     | 0.11                                  | 0.11     |
| penalized.pls | 200 | 0.5       | 0.00         | 0.72         | 1.00                  | 1.00                   | 0.72             | 0.72     | 0.26                                  | 0.26     |
| penalized.pls | 500 | 0.25      | 0.01         | 0.82         | 1.00                  | 1.00                   | 0.82             | 0.82     | 0.16                                  | 0.16     |
| penalized.pls | 500 | 0.5       | 0.04         | 0.58         | 1.00                  | 1.00                   | 0.58             | 0.58     | 0.39                                  | 0.39     |
| SCAD          | 100 | 0.25      | 0.82         | 0.04         | 1.00                  | 0.94                   | 0.88             | 0.59     | 0.94                                  | 0.90     |
| SCAD          | 100 | 0.5       | 0.38         | 0.00         | 0.99                  | 0.93                   | 0.14             | 0.04     | 0.86                                  | 0.89     |
| SCAD          | 200 | 0.25      | 0.96         | 0.00         | 0.96                  | 0.95                   | 0.28             | 0.19     | 0.96                                  | 0.95     |
| SCAD          | 200 | 0.5       | 0.31         | 0.00         | 0.99                  | 0.94                   | 0.00             | 0.00     | 0.87                                  | 0.93     |
| SCAD          | 500 | 0.25      | 1.00         | 0.00         | 0.92                  | 0.95                   | 0.01             | 0.00     | 0.92                                  | 0.95     |
| SCAD          | 500 | 0.5       | 0.15         | 0.00         | 0.99                  | 0.95                   | 0.00             | 0.00     | 0.83                                  | 0.94     |

FP - false positive; FN - false negative

<sup>1</sup> corresponds to Algorithm 1, and <sup>2</sup> to Algorithm 2 in the text
